# Supplementary material for: Begin "" the beginning of something she couldn't begin"" : Writing as Repetition in Flannery O'Connor's Wise Blood
Source: Oxford University Press journal article supplement (doi:10.1093/eurheartj/ehi171), 2005-12-24
Supplement: ehi171_Supplementary_Data.zip [file ehi171_Supplementary_Data.zip]

**Supplementary online tables**

**Online Table I. Age and gender of individuals from participating countries included in the Euro Heart Survey of Stable Angina**

| <b>Country</b>         | <b>n</b> | <b>age (sd)</b> | <b>% male</b> |
|------------------------|----------|-----------------|---------------|
| <b>Northern Europe</b> |          |                 |               |
| Denmark                | 70       | 59 (12)         | 71            |
| Finland                | 76       | 61 (9)          | 51            |
| Sweden                 | 56       | 64 (9)          | 59            |
| UK                     | 319      | 62 (10)         | 60            |
|                        |          |                 |               |
| <b>Central Europe</b>  |          |                 |               |
| Albania                | 23       | 60 (8)          | 83            |
| Belarus                | 34       | 54 (8)          | 47            |
| Bosnia & Herzegovnia   | 20       | 55 (6)          | 70            |
| Bulgaria               | 30       | 60 (6)          | 57            |
| Croatia                | 54       | 59 (9)          | 50            |
| Czech Republic         | 42       | 65 (10)         | 60            |
| Georgia                | 45       | 59 (10)         | 60            |
| Hungary                | 30       | 60 (11)         | 53            |
| Latvia                 | 18       | 60 (8)          | 61            |
| Lithuania              | 77       | 64 (10)         | 77            |
| Macedonia              | 8        | 61 (12)         | 38            |
| Moldova                | 27       | 54 (8)          | 78            |
| Poland                 | 571      | 59 (9)          | 53            |
| Romania                | 145      | 56 (11)         | 68            |
| Russian Federation     | 57       | 63 (11)         | 56            |
| Serbia and Montenegro  | 8        | 54 (5)          | 88            |
| Slovakia               | 108      | 62 (10)         | 50            |
| Slovenia               | 30       | 65 (10)         | 77            |
| Ukraine                | 14       | 62 (10)         | 71            |

| <b>Country</b>              | <b>n</b> | <b>age (sd)</b> | <b>% male</b> |
|-----------------------------|----------|-----------------|---------------|
| <b>Western Europe</b>       |          |                 |               |
| Austria                     | 22       | 76 (10)         | 27            |
| Belgium                     | 3        | 57 (17)         | 100           |
| France                      | 20       | 69 (10)         | 80            |
| Germany                     | 144      | 64 (9)          | 72            |
| Netherlands                 | 762      | 60 (13)         | 47            |
|                             |          |                 |               |
| <b>Mediterranean Europe</b> |          |                 |               |
| Cyprus                      | 46       | 64 (8)          | 63            |
| Greece                      | 165      | 63 (10)         | 68            |
| Israel                      | 67       | 64 (11)         | 80            |
| Italy                       | 256      | 66 (10)         | 63            |
| Lebanon                     | 4        | 69 (4)          | 50            |
| Portugal                    | 77       | 62 (10)         | 47            |
| Spain                       | 263      | 65 (12)         | 60            |

**Online Table II. Univariate determinants of the use of exercise ECG testing in patients presenting with stable angina from the Euro Heart Survey of Stable Angina**

| Variable             | Comparison                          | Odds Ratio | 95% CI    | p value |
|----------------------|-------------------------------------|------------|-----------|---------|
| Age                  | ≥70 vs <70 yrs                      | 0.40       | 0.34-0.47 | p<0.001 |
| Sex                  | Female vs male                      | 0.77       | 0.66-0.90 | p=0.001 |
| Employment           | Unemployed vs employed              | 0.98       | 0.73-1.30 | p=0.87  |
| Type of centre       | Invasive vs non-invasive facilities | 1.47       | 1.24-1.74 | p<0.001 |
| Education            | Tertiary vs < tertiary              | 1.19       | 0.94-1.51 | p=0.15  |
| Comorbidity          | Any vs no comorbidity               | 0.52       | 0.44-0.63 | p<0.001 |
| Duration of symptoms | ≥ 6 months vs < 6 months            | 0.66       | 0.56-0.76 | p<0.001 |
| CCS class            | Class 2 vs class 1                  | 0.65       | 0.55-0.78 | p<0.001 |
|                      | Class 3 vs class 1                  | 0.56       | 0.44-0.72 |         |
| Anti-anginal drugs   | ≥2 anti-anginal drugs vs 1 or none  | 0.77       | 0.66-0.91 | p=0.002 |

CCS = Canadian Cardiovascular Society

Anti-anginal drugs = nitrates, beta-blockers, calcium antagonists, nicorandil or metabolic agents.

**Online Table III. Univariate determinants of the use of stress imaging, either echocardiography or perfusion scanning, in patients presenting with stable angina from the Euro Heart Survey of Stable Angina**

| Variable               | Comparison                            | Odds Ratio | 95% CI      | p value |
|------------------------|---------------------------------------|------------|-------------|---------|
| Age                    | ≥70 vs <70 yrs                        | 0.97       | 0.80-1.19   | p=0.79  |
| Sex                    | Female vs male                        | 1.14       | 0.97-1.35   | p=0.12  |
| Type of centre         | Invasive vs non-invasive facilities   | 1.22       | 1.00-1.49   | p=0.047 |
| Comorbidity            | Any vs no comorbidity                 | 1.05       | 0.85-1.30   | p=0.632 |
| Duration of symptoms   | ≥ 6 months vs < 6 months              | 1.36       | 1.15-1.61   | p<0.001 |
| CCS class              | Class 2 vs class 1                    | 0.76       | 0.63-0.91   | p=0.004 |
|                        | Class 3 vs class 1                    | 0.71       | 0.53-0.94   |         |
| Anti-anginal drugs     | ≥2 anti-anginal drugs vs 1 or none    | 0.87       | 0.72-1.05   | p=0.15  |
| Reason Ex ECG not done | Pt. contraindication vs other reasons | 1.79       | 1.28 – 2.49 | p=0.001 |

CCS = Canadian Cardiovascular Society

Anti-anginal drugs = nitrates, beta-blockers, calcium antagonists, nicorandil or metabolic agents.

Ex ECG = exercise ECG

**Online Table IV. Univariate determinants of the use of coronary angiography in patients with stable angina from the Euro Heart Survey of Stable Angina**

| Variable                        | Comparison                               | Odds Ratio | 95% CI      | p value |
|---------------------------------|------------------------------------------|------------|-------------|---------|
| Age                             | ≥70 vs <70 yrs                           | 0.76       | 0.65 – 0.89 | p=0.001 |
| Sex                             | Female vs male                           | 0.48       | 0.42 – 0.55 | p<0.001 |
| Type of centre                  | Invasive vs non-invasive facilities      | 1.26       | 1.08 – 1.47 | p=0.003 |
| Comorbidity                     | Any vs no comorbidity                    | 0.96       | 0.82 – 1.14 | p=0.67  |
| Duration of symptoms            | ≥ 6 months vs < 6 months                 | 1.25       | 1.10 – 1.42 | p=0.001 |
| CCS class                       | Class 2 vs class 1                       | 1.30       | 1.12 – 1.50 | p<0.001 |
|                                 | Class 3 vs class 1                       | 2.65       | 2.12 – 3.31 |         |
| Anti-anginal drugs              | ≥2 anti-anginal drugs vs 1 or none       | 2.24       | 1.94 – 2.59 | p<0.001 |
| Reason Ex ECG not done          | Pt contraindication vs other reasons     | 1.01       | 0.74 – 1.38 | p=0.96  |
| Outcome of Ex ECG               | Positive vs negative or inconclusive     | 7.78       | 6.43 – 9.42 | p<0.001 |
| Outcome of perfusion            | Positive vs negative or inconclusive     | 9.05       | 5.13-15.98  | p<0.001 |
| Outcome of stress echo          | Positive vs negative or inconclusive     | 20.57      | 5.98-70.81  | p<0.001 |
| Left ventricular (LV) function* | Non invasive evidence of poor LV vs none | 1.49       | 1.25-1.79   | p<0.001 |

CCS = Canadian Cardiovascular Society

Anti-anginal drugs = nitrates, beta-blockers, calcium antagonists, nicorandil or metabolic agents.

Ex ECG= exercise ECG

\* Non invasive evidence of poor left ventricular function was determined by the presence of clinical signs of heart failure on examination, pulmonary congestion on CXR or poor LV function on echocardiogram or any combination of these features.
